# Supplementary material
Source: PubMed Central journal article supplement (PMC3416174)
Supplement: JVI.01214-12_zjv999096432so1.pdf [file JVI.01214-12_zjv999096432so1.pdf]

## Supplementary Information

**Supplementary Table 1. Glycans covalently attached on the microarray.** Different categories of glycans on the array are color-coded in column 1 as follows: No color, sialic acid; blue,  $\alpha$ 2-3 sialosides; orange,  $\alpha$ 2-6 sialosides; magenta, mixed  $\alpha$ 2-3/ $\alpha$ 2-6 biantennaries; green, N-glycolylneuraminic acid-containing glycans; brown,  $\alpha$ 2-8-linked sialosides; purple,  $\beta$ 2-6-linked and 9-O-acetylated sialic acids; grey, asialo glycans.

| Chart # | Structure                                                                                                                                                                                 | Description              |
|---------|-------------------------------------------------------------------------------------------------------------------------------------------------------------------------------------------|--------------------------|
| 1       | $\alpha$ -Neu5Ac                                                                                                                                                                          | $\alpha$ -Neu5Ac         |
| 2       | $\alpha$ -Neu5Ac                                                                                                                                                                          | $\alpha$ -Neu5Ac         |
| 3       | b-Neu5Ac                                                                                                                                                                                  | $\beta$ -Neu5Ac          |
| 4       | Neu5Ac $\alpha$ 2-3(6-O-Su)Gal $\beta$ 1-4(Fuc $\alpha$ 1-3)GlcNAc $\beta$                                                                                                                | $\alpha$ 2-3 so4         |
| 5       | Neu5Ac $\alpha$ 2-3Gal $\beta$ 1-3[6OSO3]GalNAc $\alpha$                                                                                                                                  | $\alpha$ 2-3 so4         |
| 6       | Neu5Ac $\alpha$ 2-3Gal $\beta$ 1-4[6OSO3]GlcNAc $\beta$                                                                                                                                   | $\alpha$ 2-3 so4         |
| 7       | Neu5Ac $\alpha$ 2-3Gal $\beta$ 1-4(Fuc $\alpha$ 1-3)(6OSO3)GlcNAc $\beta$                                                                                                                 | $\alpha$ 2-3 so4         |
| 8       | Neu5Ac $\alpha$ 2-3Gal $\beta$ 1-3(6OSO3)GlcNAc                                                                                                                                           | $\alpha$ 2-3 so4         |
| 9       | Neu5Ac $\alpha$ 2-3Gal $\beta$ 1-3(Neu5Ac $\alpha$ 2-3Gal $\beta$ 1-4)GlcNAc $\beta$                                                                                                      | di-sialoside             |
| 10      | Neu5Ac $\alpha$ 2-3Gal $\beta$ 1-3(Neu5Ac $\alpha$ 2-3Gal $\beta$ 1-4GlcNAc $\beta$ 1-6)GalNAc $\beta$                                                                                    | di-sialoside             |
| 11      | Neu5Ac $\alpha$ 2-3Gal $\beta$ 1-4GlcNAc $\beta$ 1-2Man $\alpha$ 1-3(Neu5Ac $\alpha$ 2-3Gal $\beta$ 1-4GlcNAc $\beta$ 1-2Man $\alpha$ 1-6)Man $\beta$ 1-4GlcNAc $\beta$ 1-4GlcNAc $\beta$ | $\alpha$ 2-3 biantennary |
| 12      | Neu5Ac $\alpha$ 2-3Gal $\beta$                                                                                                                                                            | $\alpha$ 2-3             |
| 13      | Neu5Ac $\alpha$ 2-3GalNAc $\alpha$                                                                                                                                                        | $\alpha$ 2-3             |
| 14      | Neu5Ac $\alpha$ 2-3Gal $\beta$ 1-3GalNAc $\alpha$                                                                                                                                         | $\alpha$ 2-3             |
| 15      | Neu5Ac $\alpha$ 2-3Gal $\beta$ 1-3GlcNAc $\beta$                                                                                                                                          | $\alpha$ 2-3             |
| 16      | Neu5Ac $\alpha$ 2-3Gal $\beta$ 1-3GlcNAc $\beta$                                                                                                                                          | $\alpha$ 2-3             |
| 17      | Neu5Ac $\alpha$ 2-3Gal $\beta$ 1-4Glc $\beta$                                                                                                                                             | $\alpha$ 2-3             |
| 18      | Neu5Ac $\alpha$ 2-3Gal $\beta$ 1-4Glc $\beta$                                                                                                                                             | $\alpha$ 2-3             |
| 19      | Neu5Ac $\alpha$ 2-3Gal $\beta$ 1-4GlcNAc $\beta$                                                                                                                                          | $\alpha$ 2-3             |
| 20      | Neu5Ac $\alpha$ 2-3Gal $\beta$ 1-4GlcNAc $\beta$                                                                                                                                          | $\alpha$ 2-3             |
| 21      | Neu5Ac $\alpha$ 2-3GalNAc $\beta$ 1-4GlcNAc $\beta$                                                                                                                                       | $\alpha$ 2-3             |
| 22      | Neu5Ac $\alpha$ 2-3Gal $\beta$ 1-4GlcNAc $\beta$ 1-3Gal $\beta$ 1-4GlcNAc $\beta$                                                                                                         | $\alpha$ 2-3             |
| 23      | Neu5Ac $\alpha$ 2-3Gal $\beta$ 1-3GlcNAc $\beta$ 1-3Gal $\beta$ 1-3GlcNAc $\beta$                                                                                                         | $\alpha$ 2-3             |
| 24      | Neu5Ac $\alpha$ 2-3Gal $\beta$ 1-4GlcNAc $\beta$ 1-3Gal $\beta$ 1-4GlcNAc $\beta$ 1-3Gal $\beta$ 1-4GlcNAc $\beta$                                                                        | $\alpha$ 2-3             |
| 25      | Neu5Ac $\alpha$ 2-3Gal $\beta$ 1-4GlcNAc $\beta$ 1-3Gal $\beta$ 1-3GlcNAc $\beta$                                                                                                         | $\alpha$ 2-3             |
| 26      | Neu5Ac $\alpha$ 2-3Gal $\beta$ 1-3GalNAc $\alpha$                                                                                                                                         | $\alpha$ 2-3             |
| 27      | Gal $\beta$ 1-3(Neu5Ac $\alpha$ 2-3Gal $\beta$ 1-4(Fuc $\alpha$ 1-3)GlcNAc $\beta$ 1-6)GalNAc $\beta$                                                                                     | $\alpha$ 2-3 fucosylated |
| 28      | Neu5Ac $\alpha$ 2-3Gal $\beta$ 1-3(Fuc $\alpha$ 1-4)GlcNAc $\beta$                                                                                                                        | $\alpha$ 2-3 fucosylated |
| 29      | Neu5Ac $\alpha$ 2-3Gal $\beta$ 1-4(Fuc $\alpha$ 1-3)GlcNAc $\beta$                                                                                                                        | $\alpha$ 2-3 fucosylated |
| 30      | Neu5Ac $\alpha$ 2-3Gal $\beta$ 1-4(Fuc $\alpha$ 1-3)GlcNAc $\beta$                                                                                                                        | $\alpha$ 2-3 fucosylated |
| 31      | Neu5Ac $\alpha$ 2-3Gal $\beta$ 1-4(Fuc $\alpha$ 1-3)GlcNAc $\beta$ 1-3Gal $\beta$                                                                                                         | $\alpha$ 2-3 fucosylated |
| 32      | Neu5Ac $\alpha$ 2-3Gal $\beta$ 1-4(Fuc $\alpha$ 1-3)GlcNAc $\beta$ 1-3Gal $\beta$ 1-4GlcNAc $\beta$                                                                                       | $\alpha$ 2-3 fucosylated |
| 33      | Neu5Ac $\alpha$ 2-3Gal $\beta$ 1-4(Fuc $\alpha$ 1-3)GlcNAc $\beta$ 1-3Gal $\beta$ 1-4(Fuc $\alpha$ 1-3)GlcNAc $\beta$ 1-3Gal $\beta$ 1-4(Fuc $\alpha$ 1-3)GlcNAc $\beta$                  | $\alpha$ 2-3 fucosylated |
| 34      | Neu5Ac $\alpha$ 2-3Gal $\beta$ 1-4GlcNAc $\beta$ 1-3Gal $\beta$ 1-4(Fuc $\alpha$ 1-3)GlcNAc                                                                                               | $\alpha$ 2-3 fucosylated |
| 35      | Neu5Ac $\alpha$ 2-3(GalNAc $\beta$ 1-4)Gal $\beta$ 1-4GlcNAc $\beta$                                                                                                                      | $\alpha$ 2-3 internal    |

|    |                                                                                                                                                                                           |                                  |
|----|-------------------------------------------------------------------------------------------------------------------------------------------------------------------------------------------|----------------------------------|
| 36 | Neu5Ac $\alpha$ 2-3(GalNAc $\beta$ 1-4)Gal $\beta$ 1-4GlcNAc $\beta$                                                                                                                      | $\alpha$ 2-3 internal            |
| 37 | Neu5Ac $\alpha$ 2-3(GalNAc $\beta$ 1-4)Gal $\beta$ 1-4Glc $\beta$                                                                                                                         | $\alpha$ 2-3 internal            |
| 38 | Gal $\beta$ 1-3GalNAc $\beta$ 1-4(Neu5Ac $\alpha$ 2-3)Gal $\beta$ 1-4Glc $\beta$                                                                                                          | $\alpha$ 2-3 internal            |
| 39 | Fuca1-2Gal $\beta$ 1-3GalNAc $\beta$ 1-4(Neu5Ac $\alpha$ 2-3)Gal $\beta$ 1-4Glc $\beta$                                                                                                   | $\alpha$ 2-3 internal            |
| 40 | Fuca1-2Gal $\beta$ 1-3GalNAc $\beta$ 1-4(Neu5Ac $\alpha$ 2-3)Gal $\beta$ 1-4Glc $\beta$                                                                                                   | $\alpha$ 2-3 internal            |
| 41 | Neu5Ac $\alpha$ 2-6Gal $\beta$ 1-4[6OSO <sub>3</sub> ]GlcNAc $\beta$                                                                                                                      | $\alpha$ 2-6 so4                 |
| 42 | Gal $\beta$ 1-4GlcNAc $\beta$ 1-2Man $\alpha$ 1-3(Neu5Ac $\alpha$ 2-6Gal $\beta$ 1-4GlcNAc $\beta$ 1-2Man $\alpha$ 1-6)Man $\beta$ 1-4GlcNAc $\beta$ 1-4GlcNAc $\beta$                    | $\alpha$ 2-6 branched            |
| 43 | GlcNAc $\beta$ 1-2Man $\alpha$ 1-3(Neu5Ac $\alpha$ 2-6Gal $\beta$ 1-4GlcNAc $\beta$ 1-2Man $\alpha$ 1-6)Man $\beta$ 1-4GlcNAc $\beta$ 1-4GlcNAc $\beta$                                   | $\alpha$ 2-6 branched            |
| 44 | Gal $\beta$ 1-4GlcNAc $\beta$ 1-2Man $\alpha$ 1-3(Neu5Ac $\alpha$ 2-6Gal $\beta$ 1-4GlcNAc $\beta$ 1-2Man $\alpha$ 1-6)Man $\beta$ 1-4GlcNAc $\beta$ 1-4GlcNAc $\beta$                    | $\alpha$ 2-6 branched            |
| 45 | Neu5Ac $\alpha$ 2-6Gal $\beta$ 1-4GlcNAc $\beta$ 1-2Man $\alpha$ 1-3(GlcNAc $\beta$ 1-2Man $\alpha$ 1-6)Man $\beta$ 1-4GlcNAc $\beta$ 1-4GlcNAc $\beta$                                   | $\alpha$ 2-6 branched            |
| 46 | Neu5Ac $\alpha$ 2-6Gal $\beta$ 1-4GlcNAc $\beta$ 1-2Man $\alpha$ 1-3(Neu5Ac $\alpha$ 2-6Gal $\beta$ 1-4GlcNAc $\beta$ 1-2Man $\alpha$ 1-6)Man $\beta$ 1-4GlcNAc $\beta$ 1-4GlcNAc $\beta$ | $\alpha$ 2-6 biantenary          |
| 47 | Neu5Ac $\alpha$ 2-6Gal $\beta$ 1-4GlcNAc $\beta$ 1-2Man $\alpha$ 1-3(Neu5Ac $\alpha$ 2-6Gal $\beta$ 1-4GlcNAc $\beta$ 1-2Man $\alpha$ 1-6)Man $\beta$ 1-4GlcNAc $\beta$ 1-4GlcNAc $\beta$ | $\alpha$ 2-6 biantenary          |
| 48 | Neu5Ac $\alpha$ 2-6Gal $\beta$ 1-4GlcNAc $\beta$ 1-2Man $\alpha$ 1-3(Neu5Ac $\alpha$ 2-6Gal $\beta$ 1-4GlcNAc $\beta$ 1-2Man $\alpha$ 1-6)Man $\beta$ 1-4GlcNAc $\beta$ 1-4GlcNAc $\beta$ | $\alpha$ 2-6 biantenary          |
| 49 | Neu5Ac $\alpha$ 2-6Gal $\beta$ 1-4GlcNAc $\beta$ 1-2Man $\alpha$ 1-3(Gal $\beta$ 1-4GlcNAc $\beta$ 1-2Man $\alpha$ 1-6)Man $\beta$ 1-4GlcNAc $\beta$ 1-4GlcNAc $\beta$                    | $\alpha$ 2-6 biantenary          |
| 50 | Neu5Ac $\alpha$ 2-6GalNAc $\alpha$                                                                                                                                                        | $\alpha$ 2-6                     |
| 51 | Neu5Ac $\alpha$ 2-6Gal $\beta$                                                                                                                                                            | $\alpha$ 2-6                     |
| 52 | Neu5Ac $\alpha$ 2-6Gal $\beta$ 1-4Glc $\beta$                                                                                                                                             | $\alpha$ 2-6                     |
| 53 | Neu5Ac $\alpha$ 2-6Gal $\beta$ 1-4GlcNAc $\beta$                                                                                                                                          | $\alpha$ 2-6                     |
| 54 | Neu5Ac $\alpha$ 2-6Gal $\beta$ 1-4GlcNAc $\beta$                                                                                                                                          | $\alpha$ 2-6                     |
| 55 | Neu5Ac $\alpha$ 2-6GalNAc $\beta$ 1-4GlcNAc $\beta$                                                                                                                                       | $\alpha$ 2-6                     |
| 56 | Neu5Ac $\alpha$ 2-6Gal $\beta$ 1-4GlcNAc $\beta$ 1-3Gal $\beta$ 1-4GlcNAc $\beta$                                                                                                         | $\alpha$ 2-6                     |
| 57 | Neu5Ac $\alpha$ 2-6Gal $\beta$ 1-4GlcNAc $\beta$ 1-3Gal $\beta$ 1-4(Fuca1-3)GlcNAc $\beta$ 1-3Gal $\beta$ 1-4(Fuca1-3)GlcNAc $\beta$                                                      | $\alpha$ 2-6 + fucosylation      |
| 58 | Gal $\beta$ 1-3(Neu5Ac $\alpha$ 2-6)GlcNAc $\beta$ 1-3Gal $\beta$ 1-4Glc $\beta$                                                                                                          | $\alpha$ 2-6 internal            |
| 59 | Gal $\beta$ 1-3(Neu5Ac $\alpha$ 2-6)GalNAc $\alpha$                                                                                                                                       | $\alpha$ 2-6 internal            |
| 60 | Neu5Ac $\alpha$ 2-3Gal $\beta$ 1-4GlcNAc $\beta$ 1-2Man $\alpha$ 1-3(Neu5Ac $\alpha$ 2-6Gal $\beta$ 1-4GlcNAc $\beta$ 1-2Man $\alpha$ 1-6)Man $\beta$ 1-4GlcNAc $\beta$ 1-4GlcNAc $\beta$ | $\alpha$ 2-3/6 biantenary        |
| 61 | Neu5Ac $\alpha$ 2-6Gal $\beta$ 1-4GlcNAc $\beta$ 1-2Man $\alpha$ 1-3(Neu5Ac $\alpha$ 2-3Gal $\beta$ 1-4GlcNAc $\beta$ 1-2Man $\alpha$ 1-6)Man $\beta$ 1-4GlcNAc $\beta$ 1-4GlcNAc $\beta$ | $\alpha$ 2-3/6 biantenary        |
| 62 | Neu5Ac $\alpha$ 2-3Gal $\beta$ 1-3(Neu5Ac $\alpha$ 2-6)GalNAc                                                                                                                             | $\alpha$ 2-3/6 disialoside       |
| 63 | Neu5Ac $\alpha$ 2-3Gal $\beta$ 1-3(Neu5Ac $\alpha$ 2-6)GalNAc $\alpha$                                                                                                                    | $\alpha$ 2-3/6 disialoside       |
| 64 | Neu5Ac $\alpha$ 2-3(Neu5Ac $\alpha$ 2-6)GalNAc $\alpha$                                                                                                                                   | $\alpha$ 2-3/6 disialoside       |
| 65 | Neu5Gc $\alpha$                                                                                                                                                                           | Neu5Gc $\alpha$                  |
| 66 | Neu5Gc $\alpha$ 2-3Gal $\beta$ 1-3(Fuca1-4)GlcNAc $\beta$                                                                                                                                 | Neu5Gc $\alpha$ 2-3              |
| 67 | Neu5Gc $\alpha$ 2-3Gal $\beta$ 1-3GlcNAc $\beta$                                                                                                                                          | Neu5Gc $\alpha$ 2-3              |
| 68 | Neu5Gc $\alpha$ 2-3Gal $\beta$ 1-4(Fuca1-3)GlcNAc $\beta$                                                                                                                                 | Neu5Gc $\alpha$ 2-3              |
| 69 | Neu5Gc $\alpha$ 2-3Gal $\beta$ 1-4GlcNAc $\beta$                                                                                                                                          | Neu5Gc $\alpha$ 2-3              |
| 70 | Neu5Gc $\alpha$ 2-3Gal $\beta$ 1-4Glc $\beta$                                                                                                                                             | Neu5Gc $\alpha$ 2-3              |
| 71 | Neu5Gc $\alpha$ 2-6GalNAc $\alpha$                                                                                                                                                        | Neu5Gc $\alpha$ 2-6              |
| 72 | Neu5Gc $\alpha$ 2-6Gal $\beta$ 1-4GlcNAc $\beta$                                                                                                                                          | Neu5Gc $\alpha$ 2-6              |
| 73 | Neu5Ac $\alpha$ 2-8Neu5Ac $\alpha$                                                                                                                                                        | Neu5Ac $\alpha$ 2-8              |
| 74 | Neu5Ac $\alpha$ 2-8Neu5Ac $\alpha$ 2-8Neu5Ac $\alpha$                                                                                                                                     | Neu5Ac $\alpha$ 2-8              |
| 75 | Neu5Ac $\alpha$ 2-8Neu5Ac $\alpha$ 2-3(GalNAc $\beta$ 1-4)Gal $\beta$ 1-4Glc $\beta$                                                                                                      | Neu5Ac $\alpha$ 2-8 $\alpha$ 2-3 |
| 76 | Neu5Ac $\alpha$ 2-8Neu5Ac $\alpha$ 2-3Gal $\beta$ 1-4Glc $\beta$                                                                                                                          | Neu5Ac $\alpha$ 2-8 $\alpha$ 2-3 |

|    |                                                                                                                    |                                               |
|----|--------------------------------------------------------------------------------------------------------------------|-----------------------------------------------|
| 77 | Neu5Ac $\alpha$ 2-8Neu5Ac $\alpha$ 2-8Neu5Ac $\alpha$ 2-3(GalNAc $\beta$ 1-4)Gal $\beta$ 1-4Glc $\beta$            | Neu5Ac $\alpha$ 2-8 $\alpha$ 2-8 $\alpha$ 2-3 |
| 78 | Neu5Ac $\alpha$ 2-8Neu5Ac $\alpha$ 2-8Neu5Ac $\alpha$ 2-3Gal $\beta$ 1-4Glc $\beta$                                | Neu5Ac $\alpha$ 2-8 $\alpha$ 2-8 $\alpha$ 2-3 |
| 79 | Neu5Ac $\alpha$ 2-8Neu5Ac $\alpha$                                                                                 | Neu5Ac $\alpha$ 2-8                           |
| 80 | Neu5Ac $\alpha$ 2-8Neu5Ac $\beta$                                                                                  | Neu5Ac $\alpha$ 2-8                           |
| 81 | Neu5Ac $\alpha$ 2-8Neu5Ac $\alpha$ 2-8Neu5Ac $\beta$                                                               | Neu5Ac $\alpha$ 2-8 $\alpha$ 2-8              |
| 82 | Neu5Ac $\beta$ 2-6GalNAc $\alpha$                                                                                  | $\beta$ 2-6                                   |
| 83 | Neu5Ac $\beta$ 2-6Gal $\beta$ 1-4GlcNAc $\beta$                                                                    | $\beta$ 2-6                                   |
| 84 | Neu5Gc $\beta$ 2-6Gal $\beta$ 1-4GlcNAc                                                                            | $\beta$ 2-6                                   |
| 85 | Gal $\beta$ 1-3(Neu5Ac $\beta$ 2-6)GalNAc $\alpha$                                                                 | $\beta$ 2-6                                   |
| 86 | 9NAcNeu5Ac $\alpha$                                                                                                | 9NAcNeu5                                      |
| 87 | 9NAcNeu5Ac $\alpha$ 2-6Gal $\beta$ 1-4GlcNAc $\beta$                                                               | 9NAcNeu5                                      |
| 88 | Gal $\beta$ 1-4GlcNAc $\beta$ 1-3Gal $\beta$ 1-4GlcNAc $\beta$ 1-3Gal $\beta$ 1-4GlcNAc $\beta$                    | asialo                                        |
| 89 | Gal $\beta$ 1-3GlcNAc $\beta$ 1-3Gal $\beta$ 1-3GlcNAc $\beta$                                                     | asialo                                        |
| 90 | Fuc $\alpha$ 1-2Gal $\beta$ 1-3GlcNAc $\beta$ 1-3Gal $\beta$ 1-4Glc $\beta$                                        | asialo                                        |
| 91 | Fuc $\alpha$ 1-2Gal $\beta$ 1-4(Fuc $\alpha$ 1-3)GlcNAc $\beta$ 1-3Gal $\beta$ 1-4(Fuc $\alpha$ 1-3)GlcNAc $\beta$ | asialo                                        |
| 92 | GalNAc $\alpha$ 1-3(Fuc $\alpha$ 1-2)Gal $\beta$ 1-3GlcNAc $\beta$                                                 | asialo                                        |
| 93 | GalNAc $\alpha$ 1-3(Fuc $\alpha$ 1-2)Gal $\beta$ 1-4GlcNAc $\beta$                                                 | asialo                                        |
| 94 | Gal $\alpha$ 1-3(Fuc $\alpha$ 1-2)Gal $\beta$ 1-3GlcNAc $\beta$                                                    | asialo                                        |
| 95 | Gal $\alpha$ 1-3(Fuc $\alpha$ 1-2)Gal $\beta$ 1-4(Fuc $\alpha$ 1-3)GlcNAc $\beta$                                  | asialo                                        |
| 96 | Gal $\beta$ 1-3GalNAc                                                                                              | asialo                                        |

Key: Neu5Ac = Sialic acid  
 Neu5Gc = N-glycolylneuraminic acid  
 OSO<sub>3</sub> = sulfate; Gal = galactose  
 Fuc = fucose  
 GlcNAc = N-acetyl-D-glucosamine  
 GalNAc = N-acetyl-D-galactosamine  
 Glc = D-glucose  
 Man = D-mannose  
 9NAc = 9-O-acetyl
